# Supplementary material for: Synergistic incorporation of hybrid heterobimetal–nitrogen atoms into carbon structures for superior oxygen electroreduction performance
Source: Royal Society of Chemistry journal article supplement (doi:10.1039/c5cy02016f), 2016-01-01
Supplement: c5cy02016f1.pdf [file c5cy02016f1.pdf]

## Supporting Information

### **Synergistic Incorporation of Hybrid Heterobimetal-Nitrogen Atoms into Carbon Structures for Superior Oxygen Electroreduction Performances**

Young-Woo Lee<sup>a</sup>, Geon-Hyoung An<sup>b</sup>, Seul Lee<sup>c</sup>, John Hong<sup>a</sup>, Byung-Sung Kim<sup>a</sup>, Juwon Lee<sup>a</sup>,

Da-Hee Kwak<sup>c</sup>, Hyo-Jin Ahn<sup>b</sup>, Wansoo Huh<sup>c</sup>, Seung Nam Cha<sup>a</sup>,

Kyung-Won Park<sup>c,\*</sup>, Jung Inn Sohn<sup>a,\*</sup> and Jong Min Kim<sup>a</sup>

<sup>a</sup> Department of Engineering Science, University of Oxford, Oxford OX1 3PJ, United Kingdom.

<sup>b</sup> Department of Materials Science and Engineering, Seoul National University of Science and Technology, Seoul 139-743, Republic of Korea.

<sup>c</sup> Department of Chemical Engineering, Soongsil University, Seoul 156-743, Republic of Korea.

\* Corresponding author. Tel: +44-1865-273912. Fax: +44-1865-273010. (Dr. J. I. Sohn); Tel: +82-2-820-0613. Fax: +82-2-812-5378. (Prof. K.-W. Park).

E-mail address: junginn.sohn@eng.ox.ac.uk (Dr. J. I. Sohn); kwpark@ssu.ac.kr (Prof. K.-W. Park).

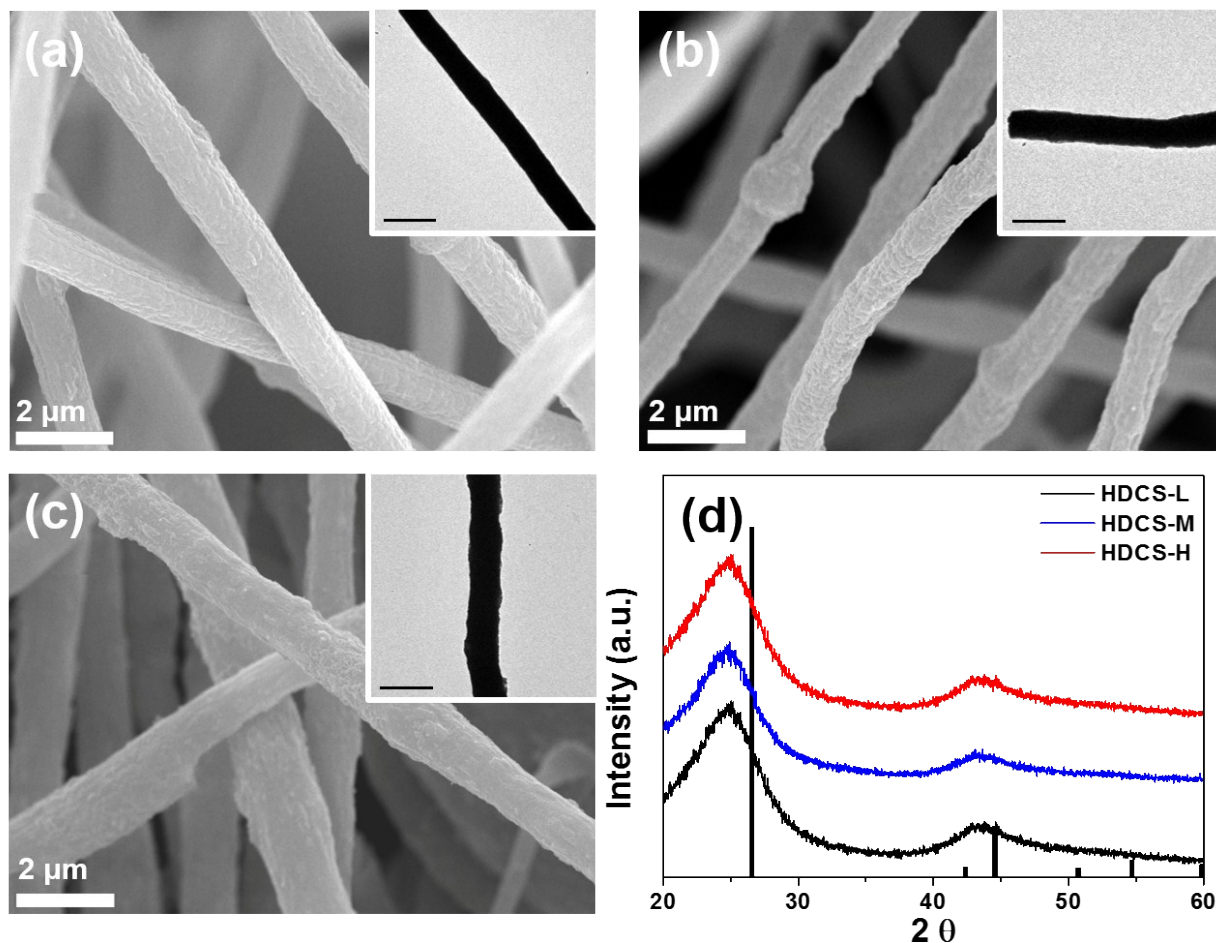

**Fig. S1.** SEM images of (a) electrospun HDCS-L, (b) HDCS-M, and (c) HDCS-H. The insert indicates corresponding TEM images and all scale bars are 2 $\mu$ m. (d) XRD patterns of the as-prepared HDCSs in comparison with XRD reference data of carbon (JCPDS No. 89-8487, black bar).

To further identify the morphology of the as-prepared HDCSs, we performed TEM analysis. As shown in the insert of Fig. S1(a-c). All as-prepared HDCSs consist of an 1-D structure and diameter of approximately 0.8~1.2  $\mu$ m, which is in good agreement with the SEM data. Furthermore, to confirm doping effects of the transition metal element on the carbon structure, the XRD patterns of as-prepared HDCSs are compared with XRD reference data of carbon. In particular, as indicated in Fig. S1(d), the peaks of the as-prepared HDCSs were slightly shifted towards lower diffraction angles, resulting from the increase in inter-spacing distances of carbon structure due to the presence of the incorporated hybrid dopants, which is good agreement in previously reported results.<sup>R1-3</sup>

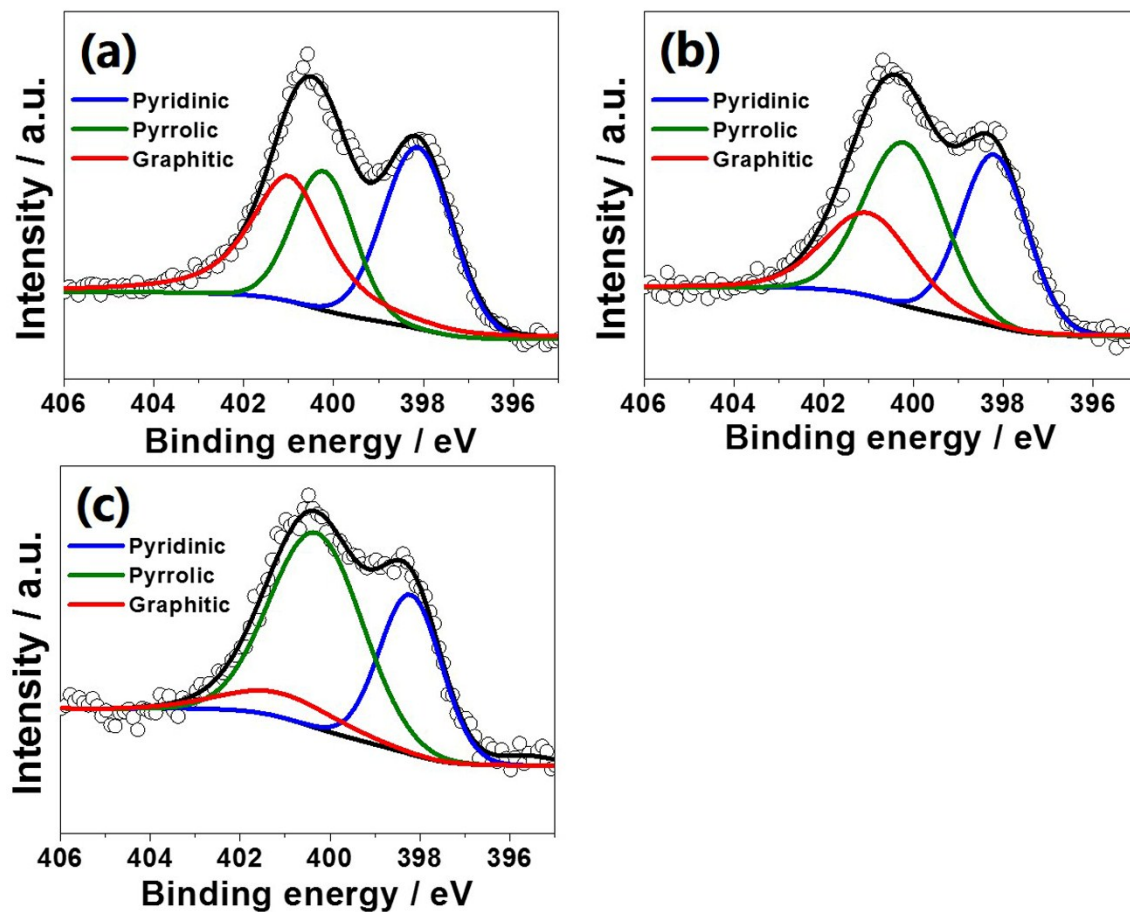

**Fig. S2.** N 1s spectra of (a) HDCS-L, (b) HDCS-M, and (c) HDCS-H, which were consisted of the pyridinic-N (blue), pyrrolic-N (green), and grphitic-N (red) bond, corresponding to around 398 eV, 400.5 eV, and 401.5 eV, respectively.

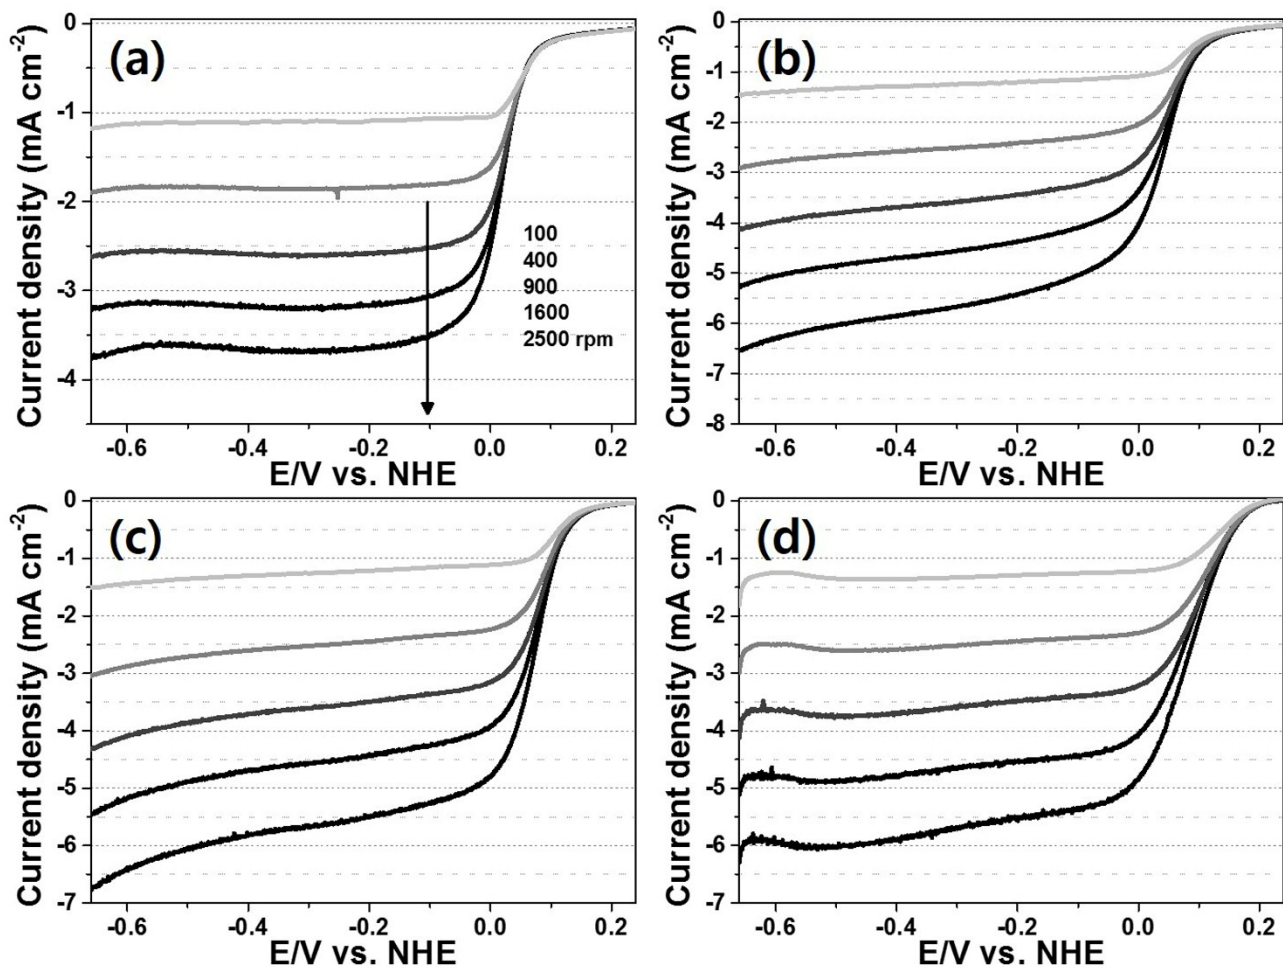

**Fig. S3.** LSVs of (a) HDCS-L, (b) HDCS-M, (c) HDCS-H, and (d) Commercial Pt electrocatalysts at various rotation speeds from 100 to 2500 rpm in an  $\text{O}_2$ -saturated 1.0 M KOH electrolyte.

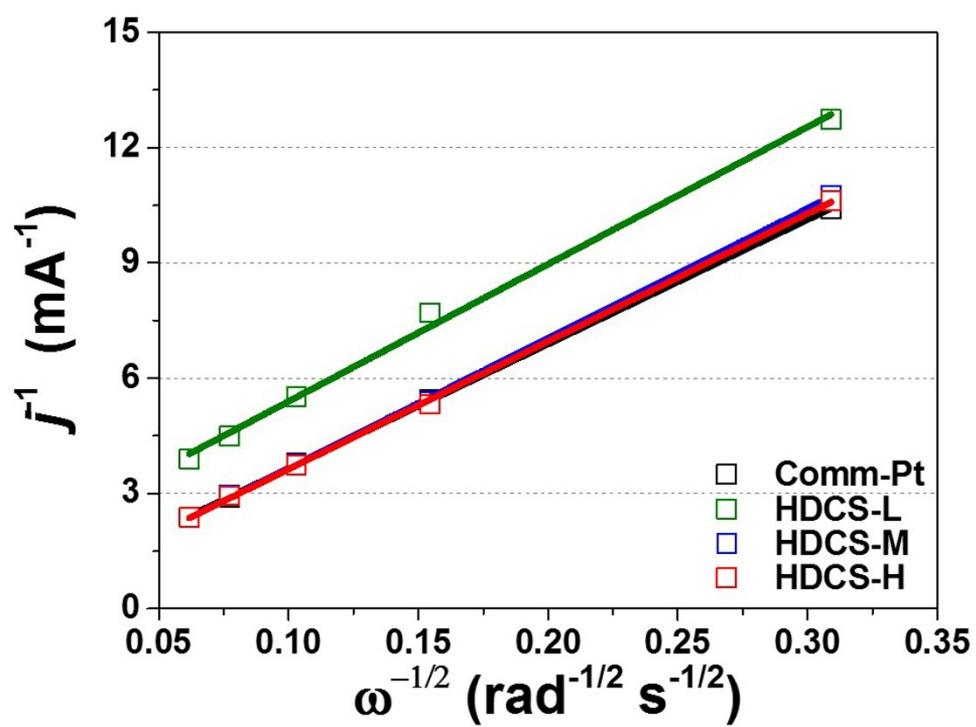

**Fig. S4.** Koutecky-Levich plots of the HDCSs and Commercial Pt electrocatalysts at -0.46 V.

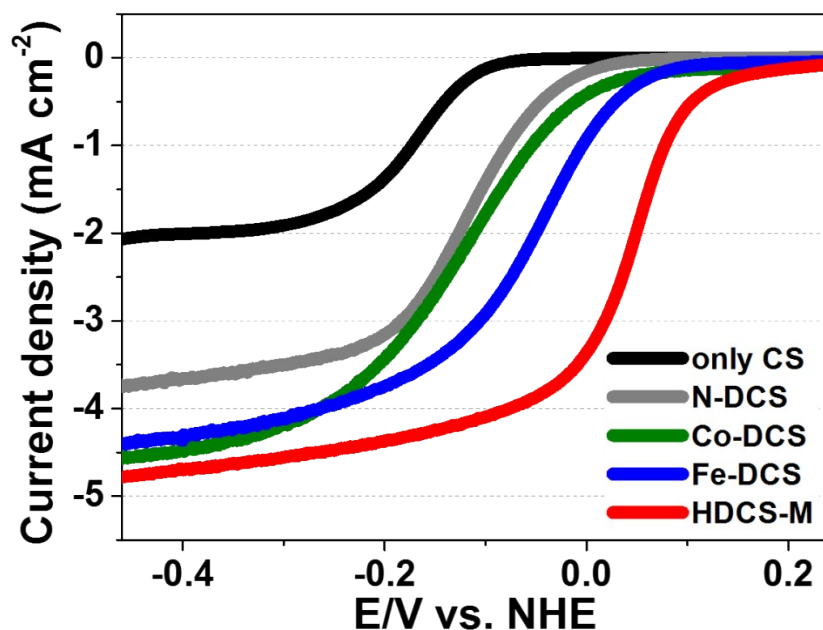

**Fig. S5.** LSVs of the only CS, N-DCS, Co-DCS, Fe-DCS, and HDCS-M electrocatalysts in an O<sub>2</sub>-saturated 1.0 M KOH electrolyte at a rotation speed of 1600 rpm.

To further identify the effect of dopants, we prepared Fe-N, Co-N, and N doped carbon structure (denoted as Fe-DCS, Co-DCS, and N-DCS, respectively) with 5 wt % of Fe-Pc, Co-Pc, and Pc precursors, respectively, in an electrospun solution under same conditions as used for the HDCS-M electrocatalyst. Also, for comparison of the effect of transition metal doping, an un-doped carbon structure (denoted as only CS) was prepared in the absence of M-Pc precursors. As shown in Fig. S5, the catalytic activity of as-prepared electrocatalysts increases the following order: HDCS-M > Fe-DCS > Co-DCS > N-DCS > only CS, which is attributed to well-distributed hybrid bimetallic dopants surrounded by N species as active sites on HDCS-M electrocatalysts. Here, we also note that it has been reported that the coexistence of Fe and Co adatoms bound with N can reduce the binding energy of oxygen molecules on a non-precious electrocatalyst, inducing the modification of electronic structures, such as down-shifting of the d-band center, compared to individual Fe-N or Co-N bonding.<sup>R4</sup> Therefore, we believe this is another reason why we achieved the outstanding ORR activity of the HDCS-M. These findings are consistent with the previously reported results.<sup>R4-8</sup>

## References

- R1 H. Peng, Z. Mo, S. Liao, H. Liang, L. Yang, F. Luo, H. Song, Y. Zhong and B. Zhang, *Sci. Rep.*, 2013, **3**, 1765.
- R2 V. M. Dhavale, S. S. Gaikwad and S. Kurungot, *J. Mater. Chem. A*, 2014, **2**, 1383-1390.
- R3 L. Qie, W. Chen, X. Xiong, C. Hu, F. Zou, P. Hu and Y. Huang, *Adv. Sci.*, 2015, **2**, 1500195.
- R4 J. Y. Cheon, T. Kim, Y.M. Choi, H. Y. Jeong, M. G. Kim, Y. J. Sa, J. Kim, Z. Lee T.-H. Yang, K. Kwon, O. Terasaki, G.-G. Park, R. R. Adzic and S. H. Joo, *Sci. Rep.*, 2013, **3**, 2715.
- R5 G. Wu, M. Nelson, S. Ma, H. Meng, G. Cui and P. K. Shen, *Carbon*, 2011, **49**, 3972-3982.
- R6 G. Wu, K. L. More, C. M. Johnston and P. Zelenay, *Science*, 2011, **332**, 443-447.
- R7 J. Sanetuntikul and S. Shanmugam, *Nanoscale*, 2015, **7**, 7644-7650.
- R8 J. Du, F. Cheng, S. Wang, T. Zhang and J. Chen, *Sci. Rep.*, 2014, **4**, 4386.
